# Supplementary material for: Synergetic regulatory networks mediated by oncogene-driven microRNAs and transcription factors in serous ovarian cancer
Source: Royal Society of Chemistry journal article supplement (doi:10.1039/c3mb70172g), 2013-09-19
Supplement: c3mb70172g.pdf [file c3mb70172g.pdf]

## Supplementary information

**Figure S1.** Network topological characteristics in regulatory network consisting of 67 FFLs in OVC. The in-degree (A), out-degree (B), path length (C), and closeness centrality (D) are plotted against to the number of nodes, neighbours, or frequency.

**Table S1.** List of 799 miRNAs, 524 human TFs, and 1257 ovarian cancer (OVC) related genes.

**Table S2.** List of 67 coherent feed-forward loops detected in the TCGA serous ovarian cancer samples.

**Table S3.** List of 32 coherent feed-forward loops involved in cell differentiation in the serous ovarian cancer.

**Table S4.** Pathway annotations of 47 protein-coding genes in the ovarian cancer regulatory network with FFLs. The functional annotation and statistical enrichment results were obtained from the IPA pathway analysis tool.

**Table S5.** Summary of the 17 datasets having more than 67 FFLs from randomization analyses.
